# Supplementary material
Source: PubMed Central journal article supplement (PMC6886233)

## **ONLINE ONLY SUPPLEMENTARY MATERIALS**

Supplemental Table 1. Baseline Demographics and Disease Characteristics by Cohort and Dose Group

Supplemental Table 2. Incidence of Adverse Events in Cohort A by Dose Group

Supplemental Table 3. Incidence of Adverse Events in Cohort B by Dose Group

Supplemental Table 4. Incidence of Adverse Events in Cohort C by Dose Group

Supplemental Figure 1. Change from baseline in the sum of longest diameters (SLD) of target lesions in patients enrolled in the pembrolizumab and carboplatin-paclitaxel cohort (A), the pembrolizumab and carboplatin-paclitaxel-bevacizumab cohort (B), and the pembrolizumab and carboplatin-pemetrexed cohort (C), by blinded, independent central review.

**Supplemental Table 1. Baseline Demographics and Disease Characteristics by Cohort and Dose Group**

|                                     | Cohort A                                  |                        | Cohort B                                              |                        | Cohort C                                  |                        |
|-------------------------------------|-------------------------------------------|------------------------|-------------------------------------------------------|------------------------|-------------------------------------------|------------------------|
|                                     | Pembrolizumab Plus Carboplatin-Paclitaxel |                        | Pembrolizumab Plus Carboplatin-Paclitaxel-Bevacizumab |                        | Pembrolizumab Plus Pemetrexed-Carboplatin |                        |
|                                     | 2 mg/kg Q3W<br>N = 13                     | 10 mg/kg Q3W<br>N = 12 | 2 mg/kg Q3W<br>N = 12                                 | 10 mg/kg Q3W<br>N = 13 | 2 mg/kg Q3W<br>N = 12                     | 10 mg/kg Q3W<br>N = 12 |
| Age, median (range), years          | 66 (45–74)                                | 62 (45–75)             | 61 (52–70)                                            | 62 (44–74)             | 59.5 (36–75)                              | 62 (53–75)             |
| Sex, n (%)                          |                                           |                        |                                                       |                        |                                           |                        |
| Male                                | 8 (62)                                    | 4 (33)                 | 6 (50)                                                | 7 (54)                 | 6 (50)                                    | 6 (50)                 |
| Female                              | 5 (38)                                    | 8 (67)                 | 6 (50)                                                | 6 (46)                 | 6 (50)                                    | 6 (50)                 |
| Ethnic origin                       |                                           |                        |                                                       |                        |                                           |                        |
| White                               | 11 (85)                                   | 8 (67)                 | 12 (100)                                              | 12 (92)                | 6 (50)                                    | 10 (83)                |
| Black or African American           | 1 (8)                                     | 3 (25)                 | 0                                                     | 0                      | 6 (50)                                    | 2 (17)                 |
| Asian                               | 1 (8)                                     | 1 (8)                  | 0                                                     | 1 (8)                  | 0                                         | 0                      |
| ECOG performance status, n (%)      |                                           |                        |                                                       |                        |                                           |                        |
| 0                                   | 5 (38)                                    | 6 (50)                 | 3 (25)                                                | 8 (62)                 | 3 (25)                                    | 4 (33)                 |
| 1                                   | 8 (62)                                    | 6 (50)                 | 9 (75)                                                | 5 (38)                 | 9 (75)                                    | 8 (67)                 |
| Histology, n (%)                    |                                           |                        |                                                       |                        |                                           |                        |
| Adenocarcinoma                      | 5 (38)                                    | 8 (67)                 | 9 (75)                                                | 12 (92)                | 9 (75)                                    | 10 (83)                |
| Squamous                            | 5 (38)                                    | 4 (33)                 | 0                                                     | 0                      | 0                                         | 0                      |
| NSCLC not otherwise specified/other | 3 (23)                                    | 0                      | 3 (25)                                                | 1 (8)                  | 3 (25)                                    | 2 (17)                 |
| Disease stage, n (%)                |                                           |                        |                                                       |                        |                                           |                        |
| IIIB                                | 0                                         | 0                      | 0                                                     | 1 (8)                  | 1 (8)                                     | 0                      |
| IV                                  | 13 (100)                                  | 12 (100)               | 12 (100)                                              | 12 (92)                | 11 (92)                                   | 12 (100)               |
| Smoking status, n (%)               |                                           |                        |                                                       |                        |                                           |                        |
| Current or former smoker            | 12 (92)                                   | 11 (92)                | 12 (100)                                              | 12 (92)                | 10 (83)                                   | 10 (83)                |
| Never                               | 1 (78)                                    | 1 (8)                  | 0                                                     | 1 (8)                  | 2 (17)                                    | 2 (17)                 |
| Brain metastases, n (%)             | 0                                         | 2 (17)                 | 2 (17)                                                | 2 (15)                 | 0                                         | 2 (17)                 |

First-line pembrolizumab and chemotherapy for advanced NSCLC

|                                             | <b>Cohort A</b>                                      |                                    | <b>Cohort B</b>                                                       |                                    | <b>Cohort C</b>                                      |                                    |
|---------------------------------------------|------------------------------------------------------|------------------------------------|-----------------------------------------------------------------------|------------------------------------|------------------------------------------------------|------------------------------------|
|                                             | <b>Pembrolizumab<br/>Plus Carboplatin-Paclitaxel</b> |                                    | <b>Pembrolizumab<br/>Plus Carboplatin-Paclitaxel-<br/>Bevacizumab</b> |                                    | <b>Pembrolizumab<br/>Plus Pemetrexed-Carboplatin</b> |                                    |
|                                             | <b>2 mg/kg Q3W<br/>N = 13</b>                        | <b>10 mg/kg<br/>Q3W<br/>N = 12</b> | <b>2 mg/kg Q3W<br/>N = 12</b>                                         | <b>10 mg/kg<br/>Q3W<br/>N = 13</b> | <b>2 mg/kg Q3W<br/>N = 12</b>                        | <b>10 mg/kg<br/>Q3W<br/>N = 12</b> |
| PD-L1 TPS                                   |                                                      |                                    |                                                                       |                                    |                                                      |                                    |
| ≥50%                                        | 7 (54)                                               | 2 (17)                             | 4 (33)                                                                | 4 (31)                             | 5 (42)                                               | 3 (25)                             |
| 1%–49%                                      | 2 (15)                                               | 4 (33)                             | 6 (50)                                                                | 6 (46)                             | 3 (25)                                               | 5 (42)                             |
| <1%                                         | 4 (31)                                               | 5 (42)                             | 2 (17)                                                                | 3 (23)                             | 4 (33)                                               | 4 (33)                             |
| Missing                                     | 0                                                    | 1 (8)                              | 0                                                                     | 0                                  | 0                                                    | 0                                  |
| Prior systemic (neo)adjuvant therapy, n (%) | 0                                                    | 1 (8)                              | 1 (8)                                                                 | 0                                  | 1 (8)                                                | 0                                  |

NSCLC, non–small-cell lung cancer; PD-L1, programmed death ligand 1; Q3W, every 3 weeks; TPS, tumor proportion score.

**Supplemental Table 2. Incidence of Adverse Events in Cohort A by Dose Group**

|                                                                        | Pembrolizumab<br>2 mg/kg Q3W plus<br>carboplatin-paclitaxel<br>N = 13 |           | Pembrolizumab<br>10 mg/kg plus<br>carboplatin-paclitaxel<br>N = 12 |           |
|------------------------------------------------------------------------|-----------------------------------------------------------------------|-----------|--------------------------------------------------------------------|-----------|
| Treatment-related AEs, n (%)                                           |                                                                       |           |                                                                    |           |
| Any grade                                                              | 13 (100)                                                              |           | 12 (100)                                                           |           |
| Grade 3–4                                                              | 7 (54)                                                                |           | 3 (25)                                                             |           |
| Leading to discontinuation                                             | 1 (8)                                                                 |           | 0                                                                  |           |
| Leading to death                                                       | 0                                                                     |           | 0                                                                  |           |
| Treatment-related AEs occurring in ≥15% of patients in cohort A, n (%) | Any grade                                                             | Grade 3/4 | Any grade                                                          | Grade 3/4 |
| Alopecia                                                               | 6 (46)                                                                | 0         | 6 (50)                                                             | 0         |
| Fatigue                                                                | 6 (46)                                                                | 1 (8)     | 5 (42)                                                             | 1 (8)     |
| Nausea                                                                 | 4 (31)                                                                | 0         | 4 (33)                                                             | 0         |
| Anemia                                                                 | 4 (31)                                                                | 1 (8)     | 3 (25)                                                             | 1 (8)     |
| Peripheral sensory neuropathy                                          | 3 (23)                                                                | 0         | 3 (25)                                                             | 0         |
| Peripheral neuropathy                                                  | 4 (31)                                                                | 0         | 2 (17)                                                             | 0         |
| Arthralgia                                                             | 5 (38)                                                                | 0         | 1 (8)                                                              | 0         |
| Rash                                                                   | 4 (31)                                                                | 0         | 2 (17)                                                             | 0         |
| Dysgeusia                                                              | 2 (15)                                                                | 0         | 3 (25)                                                             | 0         |
| Diarrhea                                                               | 2 (15)                                                                | 0         | 2 (17)                                                             | 0         |
| Thrombocytopenia                                                       | 1 (8)                                                                 | 0         | 3 (25)                                                             | 0         |
| Pain in extremity                                                      | 1 (8)                                                                 | 0         | 3 (25)                                                             | 0         |
| Immune-mediated AEs and infusion reactions, <sup>a</sup> n (%)         |                                                                       |           |                                                                    |           |
| Colitis                                                                | 1 (8)                                                                 | 0         | 1 (8)                                                              | 0         |
| Hypothyroidism                                                         | 2 (15)                                                                | 0         | 0                                                                  | 0         |
| Infusion reactions                                                     | 0                                                                     | 0         | 2 (17)                                                             | 0         |
| Pneumonitis                                                            | 1 (8)                                                                 | 0         | 0                                                                  | 0         |
| Severe skin reactions                                                  | 0                                                                     | 0         | 1 (8)                                                              | 1 (8)     |

AE, adverse event.

<sup>a</sup>Adverse events with a possible immune etiology regardless of attribution to study treatment or immune-relatedness by the investigator.

**Supplemental Table 3. Incidence of Adverse Events in Cohort B by Dose Group**

|                                                                        | Pembrolizumab<br>2 mg/kg Q3W plus<br>carboplatin-paclitaxel-<br>bevacizumab<br>N = 11 <sup>a</sup> |           | Pembrolizumab<br>10 mg/kg plus<br>carboplatin-paclitaxel-<br>bevacizumab<br>N = 13 |           |
|------------------------------------------------------------------------|----------------------------------------------------------------------------------------------------|-----------|------------------------------------------------------------------------------------|-----------|
| Treatment-related AEs, n (%)                                           |                                                                                                    |           |                                                                                    |           |
| Any grade                                                              | 11 (100)                                                                                           |           | 12 (92)                                                                            |           |
| Grade 3–4                                                              | 4 (36)                                                                                             |           | 6 (46)                                                                             |           |
| Leading to discontinuation                                             | 2 (18)                                                                                             |           | 3 (23)                                                                             |           |
| Leading to death                                                       | 0                                                                                                  |           | 0                                                                                  |           |
| Treatment-related AEs occurring in ≥15% of patients in cohort B, n (%) | Any grade                                                                                          | Grade 3/4 | Any grade                                                                          | Grade 3/4 |
| Alopecia                                                               | 8 (73)                                                                                             | 0         | 8 (62)                                                                             | 0         |
| Fatigue                                                                | 8 (73)                                                                                             | 0         | 4 (31)                                                                             | 0         |
| Constipation                                                           | 4 (36)                                                                                             | 0         | 5 (38)                                                                             | 0         |
| Nausea                                                                 | 5 (45)                                                                                             | 0         | 4 (31)                                                                             | 0         |
| Arthralgia                                                             | 4 (36)                                                                                             | 0         | 4 (31)                                                                             | 0         |
| Peripheral sensory neuropathy                                          | 5 (45)                                                                                             | 0         | 3 (23)                                                                             | 0         |
| Diarrhea                                                               | 2 (18)                                                                                             | 0         | 4 (31)                                                                             | 0         |
| Rash                                                                   | 2 (18)                                                                                             | 0         | 4 (31)                                                                             | 0         |
| White blood cell count decreased                                       | 0                                                                                                  | 0         | 4 (31)                                                                             | 2 (15)    |
| Epistaxis                                                              | 3 (27)                                                                                             | 0         | 3 (23)                                                                             | 0         |
| Appetite decreased                                                     | 1 (9)                                                                                              | 0         | 4 (31)                                                                             | 0         |
| Anemia                                                                 | 2 (18)                                                                                             | 0         | 3 (23)                                                                             | 0         |
| Neutrophil count decreased                                             | 2 (18)                                                                                             | 1 (9)     | 3 (23)                                                                             | 0         |
| Dysgeusia                                                              | 3 (27)                                                                                             | 0         | 2 (15)                                                                             | 0         |
| Hypothyroidism                                                         | 4 (36)                                                                                             | 0         | 1 (8)                                                                              | 0         |
| Pain in extremity                                                      | 3 (27)                                                                                             | 0         | 1 (8)                                                                              | 0         |
| Stomatitis                                                             | 2 (18)                                                                                             | 0         | 2 (15)                                                                             | 0         |
| Immune-mediated AEs and infusion reactions, <sup>b</sup> n (%)         |                                                                                                    |           |                                                                                    |           |
| Colitis                                                                | 0                                                                                                  | 0         | 1 (8)                                                                              | 1 (8)     |
| Hyperthyroidism                                                        | 0                                                                                                  | 0         | 1 (8)                                                                              | 0         |
| Hypothyroidism                                                         | 4 (36)                                                                                             | 0         | 1 (8)                                                                              | 0         |
| Infusion reactions                                                     | 0                                                                                                  | 0         | 4 (31)                                                                             | 2 (15)    |
| Pancreatitis                                                           | 0                                                                                                  | 0         | 1 (8)                                                                              | 1 (8)     |
| Pneumonitis                                                            | 1 (9)                                                                                              | 1 (9)     | 0                                                                                  | 0         |
| Thyroiditis                                                            | 1 (9)                                                                                              | 0         | 0                                                                                  | 0         |
| Uveitis                                                                | 0                                                                                                  | 0         | 1 (8)                                                                              | 0         |

AE, adverse event.

<sup>a</sup>One patient in cohort B withdrew before receiving therapy and is not included in safety analyses.

<sup>b</sup>Adverse events with a possible immune etiology regardless of attribution to study treatment or immune-relatedness by the investigator.

**Supplemental Table 4. Incidence of Adverse Events in Cohort C by Dose Group**

|                                                                        | Pembrolizumab<br>2 mg/kg Q3W Plus<br>Pemetrexed-Carboplatin<br>N = 12 |         | Pembrolizumab<br>10 mg/kg Plus<br>Pemetrexed-Carboplatin<br>N = 12 |         |
|------------------------------------------------------------------------|-----------------------------------------------------------------------|---------|--------------------------------------------------------------------|---------|
| Treatment-related AEs, n (%)                                           |                                                                       |         |                                                                    |         |
| Any grade                                                              | 12 (100)                                                              |         | 12 (100)                                                           |         |
| Grade 3–4                                                              | 4 (33)                                                                |         | 7 (58)                                                             |         |
| Leading to discontinuation                                             | 3 (25)                                                                |         | 3 (25)                                                             |         |
| Leading to death                                                       | 0                                                                     |         | 0                                                                  |         |
| Treatment-related AEs occurring in ≥15% of patients in cohort C, n (%) | Any grade                                                             | Grade 3 | Any grade                                                          | Grade 3 |
| Fatigue                                                                | 4 (33)                                                                | 0       | 7 (58)                                                             | 0       |
| Anemia                                                                 | 4 (33)                                                                | 1 (8)   | 4 (33)                                                             | 1 (8)   |
| Alanine aminotransferase increased                                     | 4 (33)                                                                | 1 (8)   | 3 (25)                                                             | 1 (8)   |
| Aspartate aminotransferase increased                                   | 4 (33)                                                                | 2 (17)  | 3 (25)                                                             | 1 (8)   |
| Nausea                                                                 | 4 (33)                                                                | 0       | 3 (25)                                                             | 0       |
| Diarrhea                                                               | 3 (25)                                                                | 0       | 3 (25)                                                             | 1 (8)   |
| Rash                                                                   | 1 (8)                                                                 | 0       | 4 (33)                                                             | 1 (8)   |
| Maculopapular rash                                                     | 3 (25)                                                                | 0       | 2 (17)                                                             | 0       |
| Constipation                                                           | 3 (25)                                                                | 0       | 1 (8)                                                              | 0       |
| Decreased appetite                                                     | 0                                                                     | 0       | 4 (33)                                                             | 1 (8)   |
| Dry skin                                                               | 1 (8)                                                                 | 0       | 3 (25)                                                             | 0       |
| Peripheral edema                                                       | 2 (17)                                                                | 0       | 2 (17)                                                             | 0       |
| Pruritus                                                               | 2 (17)                                                                | 0       | 2 (17)                                                             | 0       |
| Immune-mediated AEs and infusion reactions, <sup>a</sup> n (%)         |                                                                       |         |                                                                    |         |
| Adrenal insufficiency                                                  | 0                                                                     | 0       | 1 (8)                                                              | 0       |
| Colitis                                                                | 2 (17)                                                                | 1 (8)   | 1 (8)                                                              | 0       |
| Hypothyroidism                                                         | 2 (17)                                                                | 0       | 2 (17)                                                             | 0       |
| Infusion reactions                                                     | 1 (8)                                                                 | 0       | 0                                                                  | 0       |
| Severe skin reaction                                                   | 0                                                                     | 0       | 1 (8)                                                              | 1 (8)   |

AE, adverse event.

<sup>a</sup>Adverse events with a possible immune etiology regardless of attribution to study treatment or immune-relatedness by the investigator.

**Supplemental Figure 1. Change from baseline in the sum of longest diameters (SLD) of target lesions in patients enrolled in the pembrolizumab and carboplatin-paclitaxel cohort (A), the pembrolizumab and carboplatin-paclitaxel-bevacizumab cohort (B), and the pembrolizumab and carboplatin-pemetrexed cohort (C), by blinded, independent central review.**

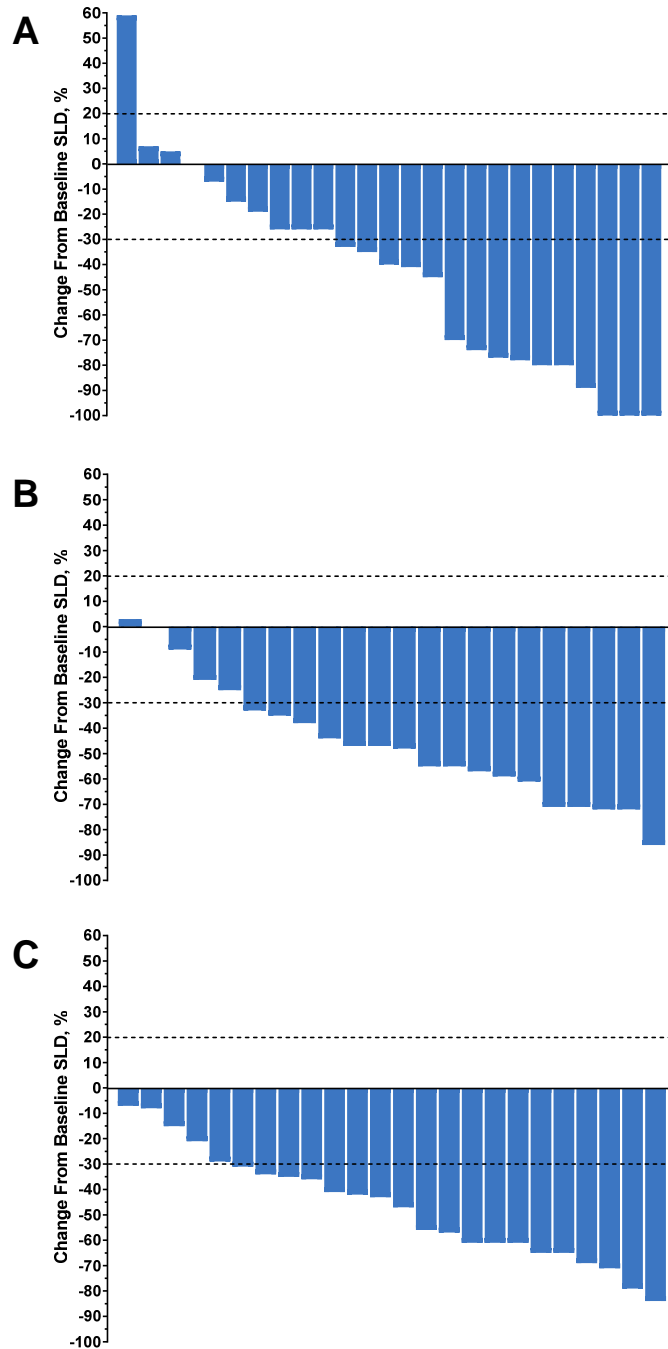

Supplement: NIHMS1060337-supplement-S1.pdf [file NIHMS1060337-supplement-S1.pdf]
